# Supplementary material for: Efficient and Rapid Induction of Human iPSCs/ESCs into Nephrogenic Intermediate Mesoderm Using Small Molecule-Based Differentiation Methods
Source: PubMed Central journal article supplement (PMC3893162; doi:10.1371/journal.pone.0084881), 2014-01-15
Supplement: pone.0084881.s006.pdf [file pone.0084881.s006.pdf]

| Retinoids            | Action                       | Kd (nM)      |             |              |              |
|----------------------|------------------------------|--------------|-------------|--------------|--------------|
|                      |                              | RAR $\alpha$ | RAR $\beta$ | RAR $\gamma$ | RXR $\alpha$ |
| ATRA                 | Pan-RAR agonist              | 15.5 ~<br>16 | 4.5 ~<br>7  | 3            | 730          |
| AM580<br>(CD336)     | RAR $\alpha$ agonist         | 8 ~<br>10    | 74 ~<br>131 | 450          | (No binding) |
| TTNPB                | Pan-RAR agonist              | 3            | 3           | 3            |              |
| SR11237<br>(BMP649)  | Pan-RXR agonist              |              |             |              | 100          |
| Adapalene<br>(CD271) | RAR $\beta$ $\gamma$ agonist | 1100         | 34          | 130          | (No binding) |
| CD1530               | RAR $\gamma$ agonist         | 2750         | 1500        | 150          |              |
