# Supplementary material for: Efficient and Rapid Induction of Human iPSCs/ESCs into Nephrogenic Intermediate Mesoderm Using Small Molecule-Based Differentiation Methods
Source: PubMed Central journal article supplement (PMC3893162; doi:10.1371/journal.pone.0084881), 2014-01-15
Supplement: pone.0084881.s007.pdf [file pone.0084881.s007.pdf]

| <b>Gene name</b>   | <b>Primer sequence</b>                             | <b>Size (bp)</b> |
|--------------------|----------------------------------------------------|------------------|
| h $\beta$ -ACTIN   | CAATGTGGCCGAGGACTTTG<br>CATTCTCCTTAGAGAGAAGTGG     | 126              |
| hRAR $\beta$       | CTGTGAGGGATGTAAGGGC<br>GTCTCCTTCTTTTTCTTGTTTCCTGTC | 195              |
| hBMP2              | TGTATCGCAGGCACTCAGGTC<br>CGGGTTGTTTTCCCACTCGTTTC   | 145              |
| hBMP4              | GACCACCTCAACTCAACCAACCA<br>GGCACCCACATCCCTCTACTA   | 184              |
| hBMP5              | CTCACCAGCGAAGGCATTACA<br>CAAAGACAAGCCAACCCACATC    | 240              |
| hBMP6              | AGCGTGGTGACAAGGGATG<br>GGGACTGGGTAGAGCGATTA        | 187              |
| hBMP7              | CAAGATAGCCATTTCTCACC<br>TCCGATTCCCTGCCCAAGT        | 257              |
| <b>Mesendoderm</b> |                                                    |                  |
| hBRACHYURY         | AATTGGTCCAGCCTTGGAAT<br>CGTTGCTCACAGACCACA         | 112              |
| hGOOSECOID         | GAGGAGAAAGTGGAGGTCTGGTT<br>CTCTGATGAGGACCGCTTCTG   | 72               |
| hMIXL1             | TTGGTTCAAAGCTGGACTCA<br>CTGTCAGTCATGGCTCCTCA       | 107              |
| <b>Ectoderm</b>    |                                                    |                  |
| hSOX1              | CACAACCTCGGAGATCAGCAA<br>GGTACTTGTAATCCGGGTGC      | 133              |
| <b>Endoderm</b>    |                                                    |                  |
| hSOX17             | CAGCAGAATCCAGACCTGCA<br>GTCAGCGCCTTCCACGACT        | 68               |

| <b>Intermediate mesoderm</b>         |                                                        |     |
|--------------------------------------|--------------------------------------------------------|-----|
| hOSR1                                | GCTGTCCACAAGACGCTACA<br>CCAGAGTCAGGCTTCTGGTC           | 137 |
| hPAX2                                | AGATTCCCAGAGTGGTGTGG<br>GGGTATGTCTGTGTGCCTGA           | 264 |
| hLIM1                                | TCATGCAGGTGAAGCAGTTC<br>TCCAGGGAAGGCAAACCTCTA          | 148 |
| hWT1                                 | GGCAGCACAGTGTGTGAACT<br>CCAGGCACACCTGGTAGTTT           | 136 |
| hEYA1                                | GGACAGGCACCATACAGCTACC<br>ATGTGCTGGATACGGTGAGCTG       | 189 |
| hCITED2                              | CACCAATGGGCTGCACCATCAC<br>GCCGCTCGTGGCATTTCATGTTG      | 157 |
| hSALL1                               | AGCGAAGCCTCAACATTTCCAATCC<br>AATTCAAAGAACTCGGCACAGCACC | 147 |
| <b>Lateral plate mesoderm</b>        |                                                        |     |
| hKDR                                 | TGATCGGAAATGACACTGGA<br>CACGACTCCATGTTGGTCAC           | 131 |
| <b>Metanephric mesenchyme</b>        |                                                        |     |
| hSIX2                                | AGGAAAGGGAGAACAACGAGAA<br>GGGCTGGATGATGAGTGGT          | 132 |
| hHOXD11                              | TGGAACGCGAGTTTTTCTTT<br>CTGCAGACGGTCTCTGTTCA           | 149 |
| <b>Nephric duct and ureteric bud</b> |                                                        |     |
| hSALL4                               | CAGATCCACGAGCGGACTCA<br>CCCCGTGTGTCATGTAGTGA           | 109 |
| hHOXB7                               | GTGGACTGTGGGTCTGGACT<br>GAACACGCGAGTGGTAGGTT           | 114 |

| <b>Metanephric stroma</b>       |                                              |     |
|---------------------------------|----------------------------------------------|-----|
| hFOXD1                          | TGCGGGTCCCTCTATTTATG<br>TAACGCCTGGACCTGAGAAT | 190 |
| <b>Gonad and adrenal cortex</b> |                                              |     |
| hDAX1/NR0B1                     | CAAGGAGTACGCCTACCTCA<br>GCGTCATCCTGGTGTGTTC  | 131 |
| hSF1/NR5A1                      | CAGGAGTTTGTCTGCCTCAA<br>GCACAGGGTGTAGTCAAGCA | 126 |
| hHSD3 $\beta$ 2                 | GAGCCATTCCTGAAAAGAGC<br>GATGAAGACTGGCACACTGG | 168 |
| hGATA4                          | CTGTCATCTCACTACGGGCA<br>GGGAGACGCATAGCCTTGT  | 132 |
| hGATA6                          | CATGACTCCAACCTCCACCT<br>ACTTGAGCTCGCTGTTCTCG | 146 |
| hLHX9                           | GCGAACCTCTTTCAAGCATC<br>TCCTTCTGAATTTGGCTCGT | 164 |

Gene names and primer sequences (5'-3') for RT-PCR and qRT-PCR are shown.
