# Supplementary material for: Efficient and Rapid Induction of Human iPSCs/ESCs into Nephrogenic Intermediate Mesoderm Using Small Molecule-Based Differentiation Methods
Source: PubMed Central journal article supplement (PMC3893162; doi:10.1371/journal.pone.0084881), 2014-01-15
Supplement: pone.0084881.s008.pdf [file pone.0084881.s008.pdf]

| <b>Antibody &amp; Lectin</b> | <b>Dilution rate</b> | <b>Manufacturer &amp; Clone</b>       |
|------------------------------|----------------------|---------------------------------------|
| BRACHYURY                    | 1 : 200              | R&D systems, MAB2085                  |
| PAX2                         | 1 : 50               | Covance Research Products, PRB-276P   |
| WT1                          | 1 : 50               | Santa Cruz Biotechnology, C-19        |
| SALL1                        | 1 : 200              | Perseus Proteomics Inc., PP-K9814-001 |
| LIM1                         | 1 : 50               | MILLIPORE, AB3200                     |
| SALL4                        | 1 : 100              | Abnova, M03                           |
| HSD3 $\beta$                 | 1 : 50               | Santa Cruz Biotechnology, 37-2        |
| GATA4                        | 1 : 50               | Santa Cruz Biotechnology, C-20        |
| GATA6                        | 1 : 50               | Santa Cruz Biotechnology, H-92        |
| LTL                          | 1 : 200              | Vector laboratories, B-1325           |
| AQP1                         | 1 : 100              | MILLIPORE, AB3272                     |
| AQP2                         | 1 : 50               | Santa Cruz Biotechnology, N-10        |
| PODOCALYXIN                  | 1 : 50               | R&D Systems, MAB1658                  |
| DBA                          | 1 : 100              | Vector laboratories, FL-1031          |
| CYTOKERATIN8                 | 1 : 200              | Abcam, ab9023                         |
| $\alpha$ SMA                 | 1 : 200              | SIGMA, A2547                          |
| E-CADHERIN                   | 1 : 200              | BD Pharmingen, 610181                 |
| Laminin                      | 1 : 200              | SIGMA, L9393                          |
| Human<br>nuclear antigen     | 1 : 100              | STEMCELLS, STEM101                    |
| Human<br>mitochondria        | 1 : 200              | Abcam, ab3298                         |
| pSmad1/5                     | 1 : 200              | Cell Signaling, 9516                  |

A summary of antibodies and dilutions used for immunostaining analysis
