# Supplementary material for: Efficient and Rapid Induction of Human iPSCs/ESCs into Nephrogenic Intermediate Mesoderm Using Small Molecule-Based Differentiation Methods
Source: PubMed Central journal article supplement (PMC3893162; doi:10.1371/journal.pone.0084881), 2014-01-15
Supplement: pone.0084881.s009.pdf [file pone.0084881.s009.pdf]

| <b>Factors</b>                                          | <b>Manufacturer</b>      |
|---------------------------------------------------------|--------------------------|
| ATRA                                                    | Sigma Aldrich            |
| AM580                                                   | Santa Cruz Biotechnology |
| TTNPB                                                   | Santa Cruz Biotechnology |
| Adapalene                                               | Sigma Aldrich            |
| CD1530                                                  | Tocris Bioscience        |
| LE135                                                   | Santa Cruz Biotechnology |
| BMS493                                                  | Sigma Aldrich            |
| MM11253                                                 | Santa Cruz Biotechnology |
| SR11237                                                 | Tocris Bioscience        |
| UVI3003                                                 | Santa Cruz Biotechnology |
| Wnt3a                                                   | StemRD                   |
| CHIR99021                                               | Axon Medchem             |
| Activin A                                               | R&D Systems              |
| BMP4                                                    | R&D Systems              |
| BMP5                                                    | R&D Systems              |
| BMP7                                                    | R&D Systems              |
| Forskolin                                               | R&D Systems              |
| SB435142                                                | Cayman Chemical          |
| ALK5 inhibitor<br>(TGF- $\beta$ RI kinase inhibitor II) | Wako                     |
| A-83-01                                                 | EMD Bioscience           |
| Noggin                                                  | PeptoTech                |
| Dorsomorphin                                            | Merck                    |
| DMH1                                                    | Tocris Bioscience        |
| LDN193189                                               | Axon Medchem             |
| IWP-2                                                   | Santa Cruz Biotechnology |
| H-89                                                    | Sigma Aldrich            |
| Bisindolylmaleimide I                                   | Merck                    |
| DAPT                                                    | R&D Systems              |
| KAAD-cyclopamine                                        | R&D Systems              |
| PD173074                                                | Wako                     |
| JAK inhibitor I                                         | Santa Cruz Biotechnology |
| CCG-1423                                                | R&D Systems              |

LY294002

R&D Systems

PD98059

Cell Signaling Technology

---
